# Supplementary figures and images for: A genetic interaction analysis identifies cancer drivers that modify EGFR dependency
Source: PubMed Central journal article supplement — Genes Dev. 2017 Jan 15;31(2):184–96. doi: 10.1101/gad.291948.116 (PMC5322732; doi:10.1101/gad.291948.116), 2017-01-15

Supplemental Figure 1

A

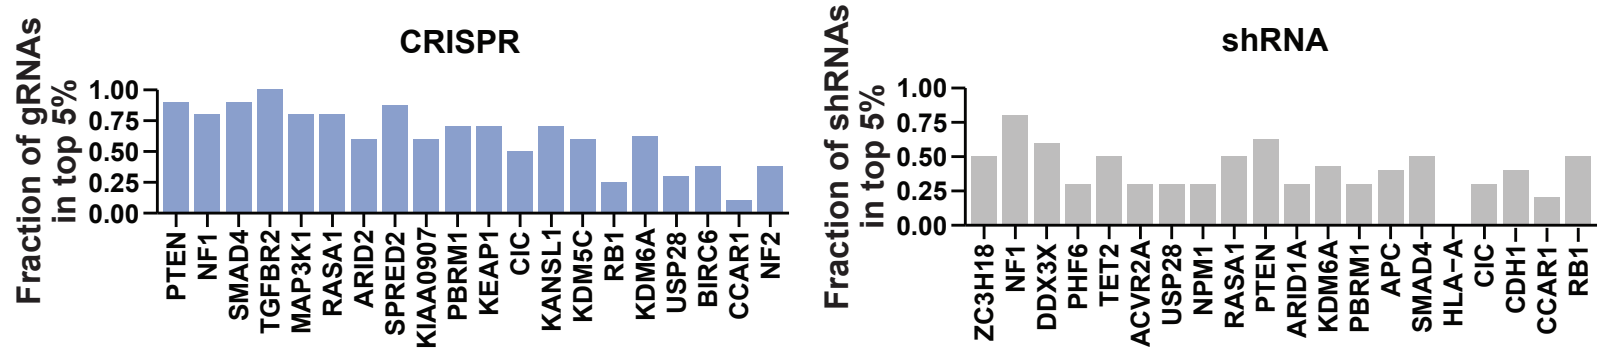

B

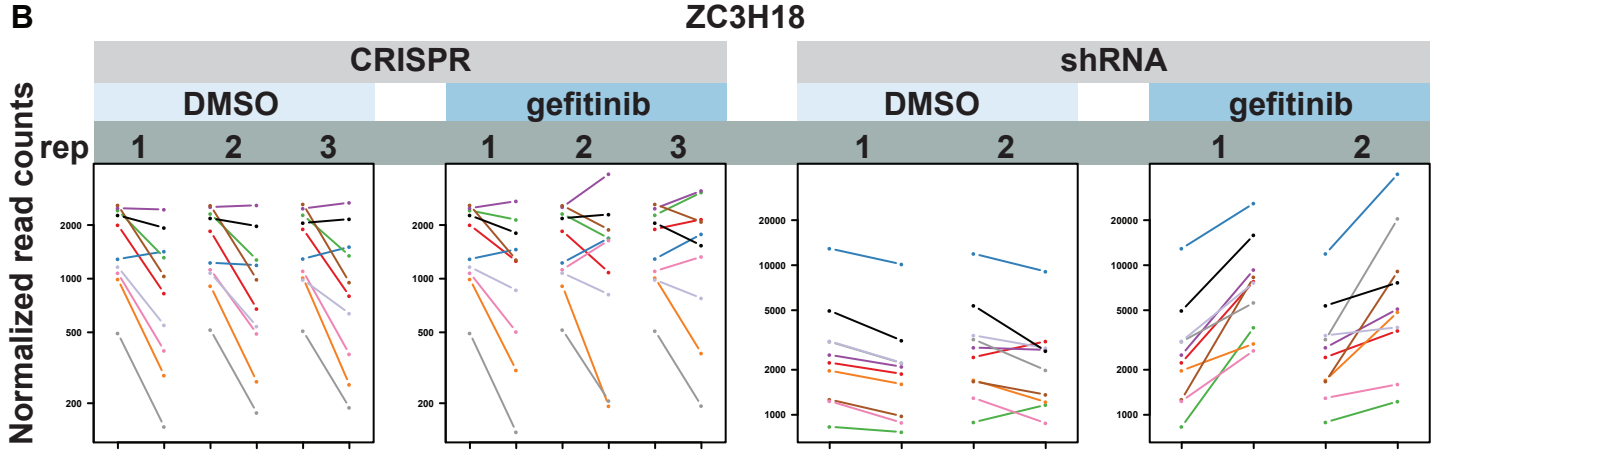

C

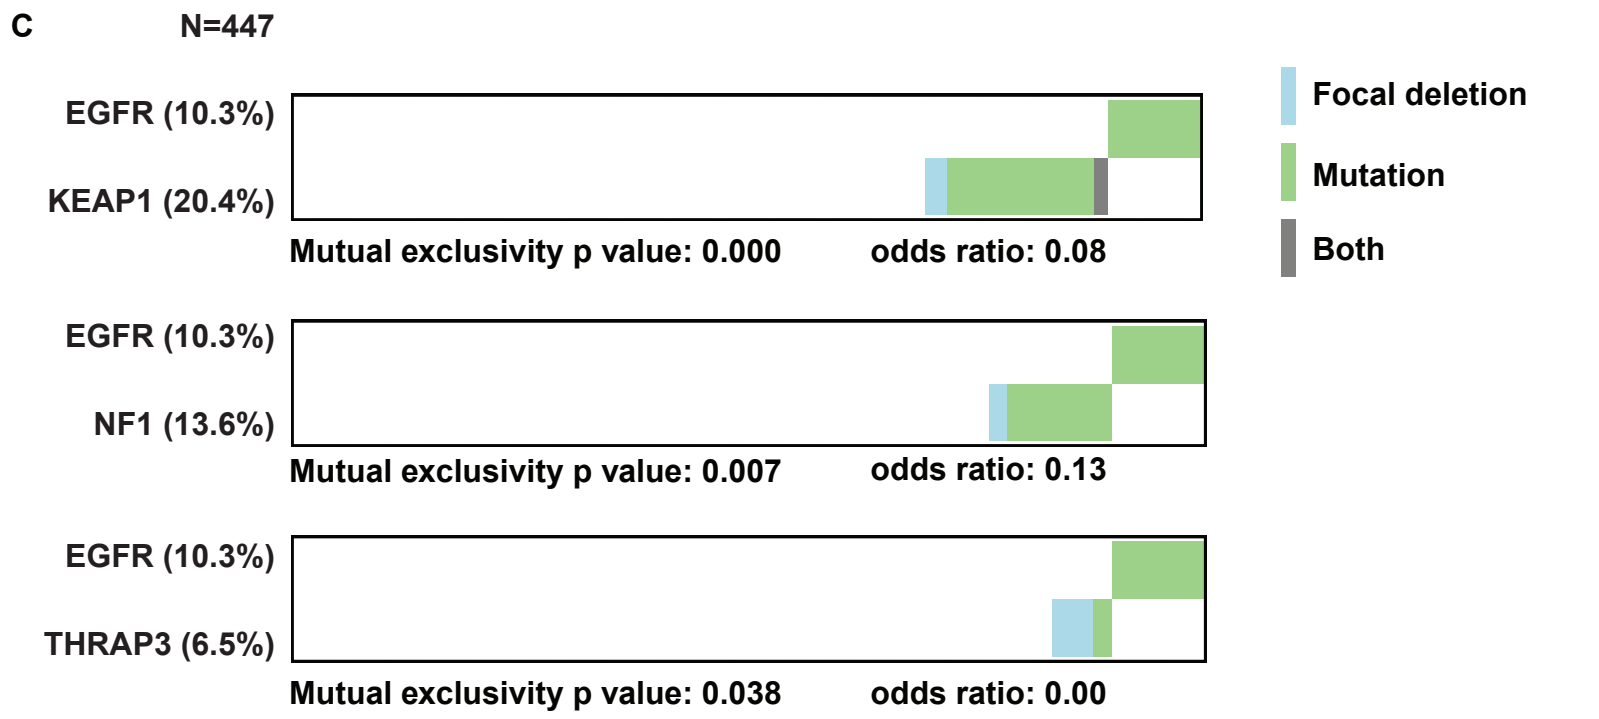

Supplement: supp_gad.291948.116_Supplemental_Figure1.pdf [file supp_gad.291948.116_Supplemental_Figure1.pdf]

Supplemental Figure 2

A

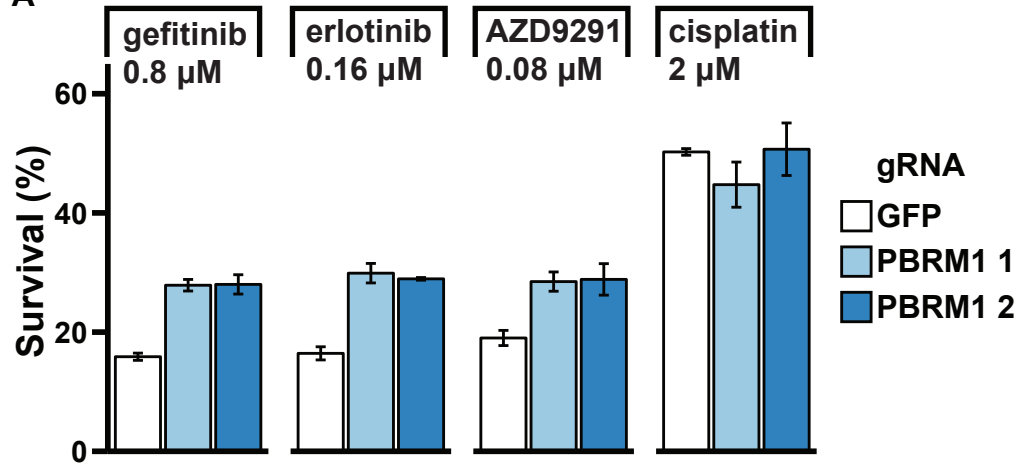

B

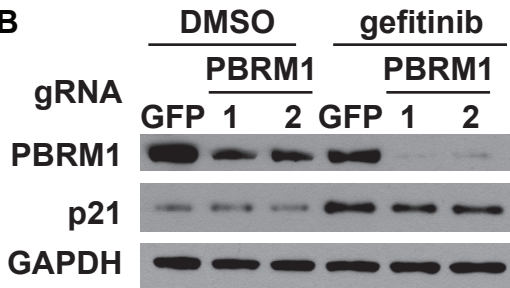

Supplement: supp_gad.291948.116_Supplemental_Figure2.pdf [file supp_gad.291948.116_Supplemental_Figure2.pdf]

Supplemental Figure 3

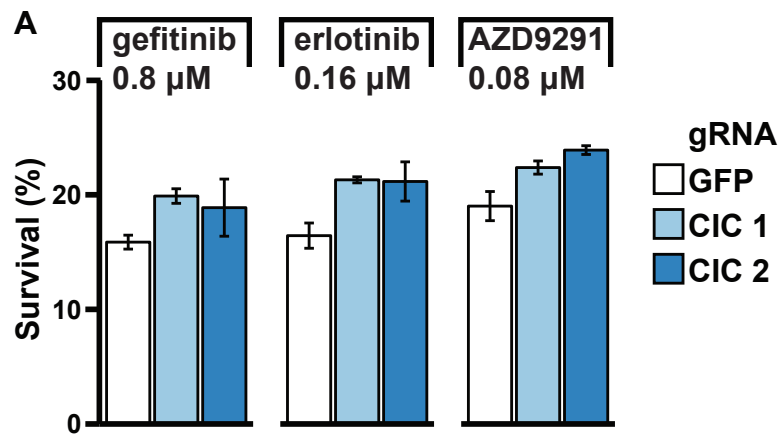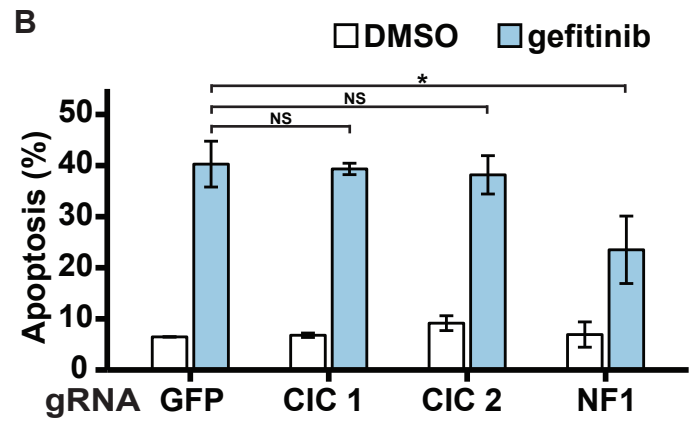

Supplement: supp_gad.291948.116_Supplemental_Figure3.pdf [file supp_gad.291948.116_Supplemental_Figure3.pdf]

Supplemental Figure 4

A

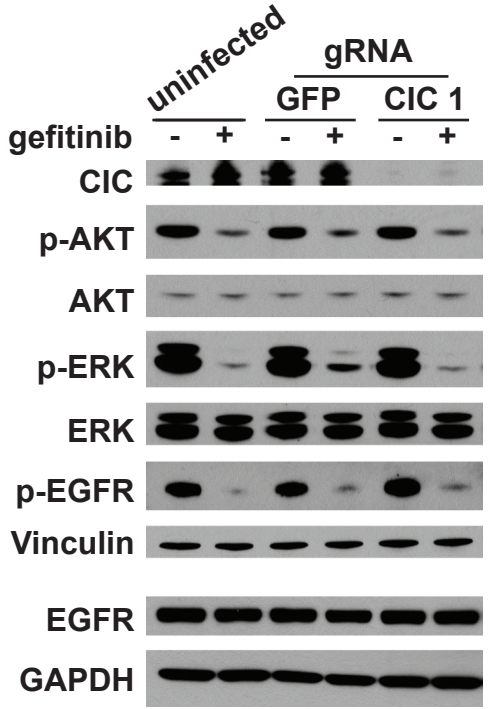

B

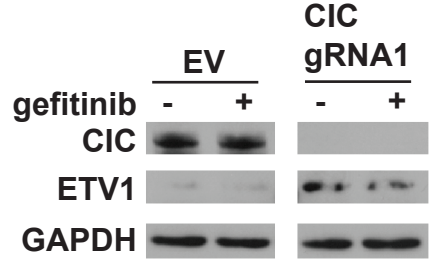

Supplement: supp_gad.291948.116_Supplemental_Figure4.pdf [file supp_gad.291948.116_Supplemental_Figure4.pdf]
